# Supplementary material for: Core–shell Co3O4/α-Fe2O3 heterostructure nanofibers with enhanced gas sensing properties
Source: Royal Society of Chemistry journal article supplement (doi:10.1039/c5ra03675e), 2015-01-01
Supplement: c5ra03675e1.pdf [file c5ra03675e1.pdf]

## Electronic Supplementary Information for

### **Core-shell $\text{Co}_3\text{O}_4/\alpha\text{-Fe}_2\text{O}_3$ heterostructure nanofibers with enhanced gas sensing properties**

**Jing Cao,<sup>ab</sup> Ziyang wang,<sup>a</sup> Rui Wang,<sup>a</sup> Sen Liu,<sup>a</sup> Teng Fei,<sup>a</sup> Lijie Wang<sup>a</sup> and Tong  
Zhang<sup>\*ab</sup>**

State Key Laboratory on Integrated Optoelectronics, College of Electronic Science and  
Engineering, Jilin University, Changchun 130012,

\* Corresponding author. E-mail address: zhangtong@jlu.edu.cn

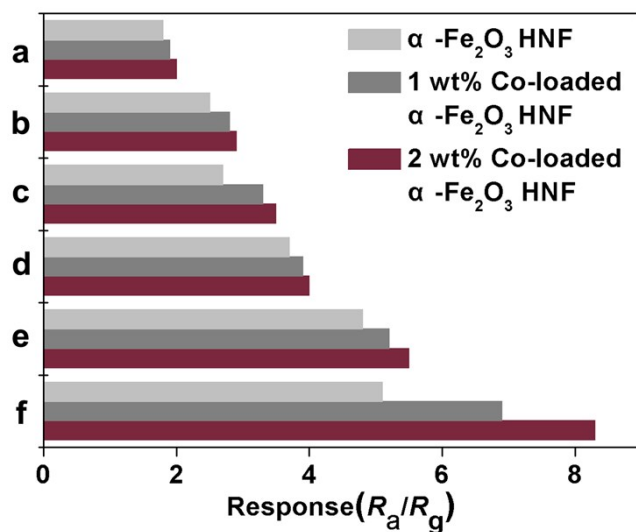

Fig. S1 Responses of  $\alpha$ -Fe<sub>2</sub>O<sub>3</sub> HNF, 1 wt% Co-loaded  $\alpha$ -Fe<sub>2</sub>O<sub>3</sub> HNF and 2 wt% Co-loaded  $\alpha$ -Fe<sub>2</sub>O<sub>3</sub> HNF sensors to 50 ppm various testing gases ((a) trichloromethane, (b) ammonia, (c) methylbenzene, (d) formaldehyde, (e) ethanol, (f) acetone) at 240 °C.
